# Supplementary material for: Decoy Receptor 3 Promotes Preosteoclast Cell Death via Reactive Oxygen Species-Induced Fas Ligand Expression and the IL-1α/IL-1 Receptor Antagonist Pathway
Source: Hindawi journal article supplement (doi:10.1155/2020/1237281), 2020-06-10
Supplement: f1 [file 1237281.f1.pdf]

## Supplementary figures

### DCR3 affects osteoclast differentiation in BMMs

Figure 1

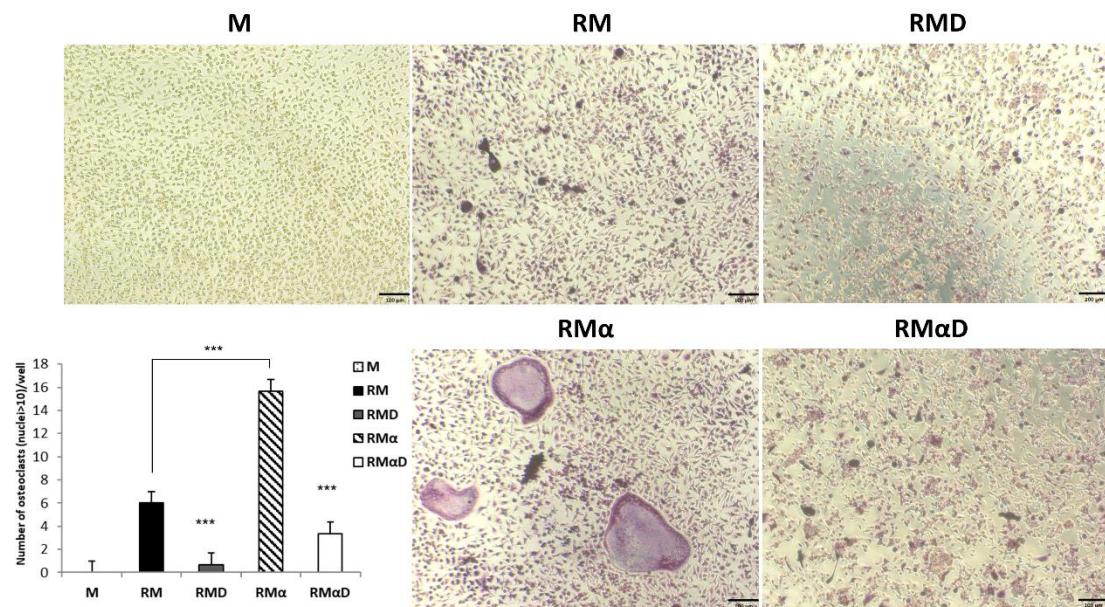

**sFig. 1 Effects of DCR3 on RANKL plus IL-1 $\alpha$  induced osteoclast differentiation in BMMs.**

BMMs were treated with DCR3 in the presence of RANKL (50 ng/ml) and M-CSF (30 ng/ml) or RANKL, IL-1 $\alpha$ , and M-CSF for 5 days. After incubation, the cells were fixed and stained for TRAP and TRAP<sup>+</sup> multinucleated cells containing more than five nuclei in RAW264.7 or ten nuclei in BMMs were counted as multinucleated osteoclasts. (M: BMM cells + MCSF; RM: RANKL + MCSF; RMD: RANKL + MCSF + DCR3; RM $\alpha$ : RANKL + MCSF + IL-1 $\alpha$ ; RM $\alpha$ D: RANKL + MCSF + IL-1 $\alpha$  + DCR3) The data represent the means  $\pm$  S.D. of more than three cultures. (\*\*\*)  $P < 0.001$ )

mRNA expression pattern of IL-1 $\alpha$ , icIL-1ra, and sIL-1ra in DCR3 treated OC

Figure 2

A

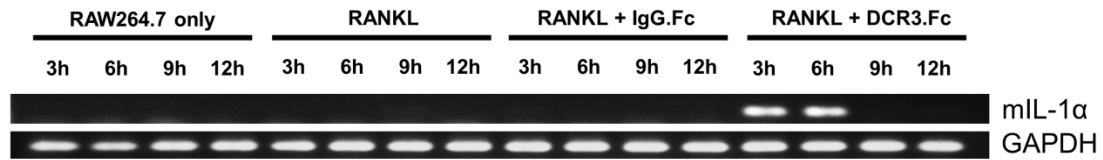

B

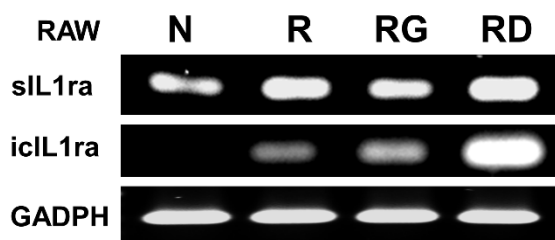

C

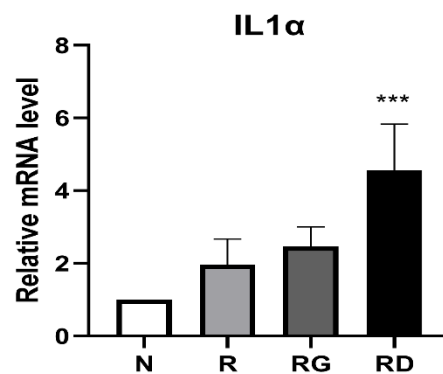

D

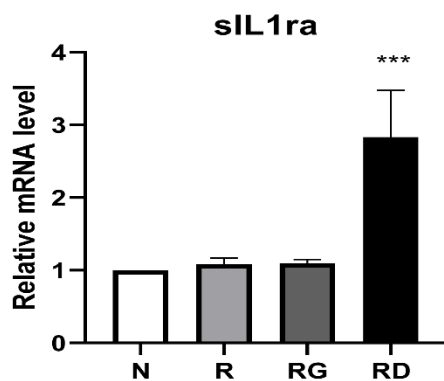

E

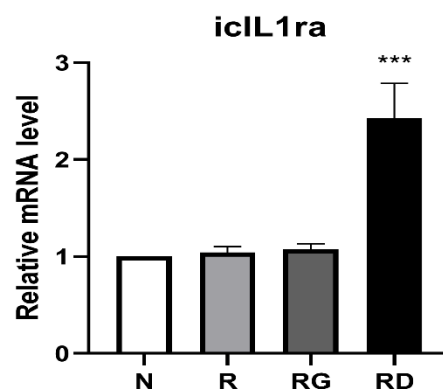

sFig. 2 Effects of DCR3 on IL-1 $\alpha$  and IL-1ra mRNA regulation in RANKL-induced osteoclast differentiation. RAW 264.7 cells were seeded in density of  $2 \times 10^5$  cells/well at 24 well plate and treated with 10  $\mu$ g/ml of DCR3 or IgG control in the presence of RANKL. After 3, 6, 9, and 12 hours treating with 10  $\mu$ g/ml DCR3 or IgG control in the present of RANKL, total RNA was isolated and 1  $\mu$ g of total RNA was used to transcribe cDNA. Mouse specific IL-1 $\alpha$ , sIL-1ra, and icIL-1ra were detected by RT-PCR (A, B). According to the peak expression of IL-1 $\alpha$  at 6 hours, IL-1 $\alpha$ , sIL-1ra, and icIL-1ra were detected and quantified at 6 hours by QPCR.

A representative result of at least three independent experiments is shown. (N: RAW264.7 cells;  
R: RANKL; RG: RANKL + IgG; RD: RANKL + DCR3; \*\*\*P < 0.001)

## Quantification of IL-1 $\alpha$ and IL-1ra protein expression in DCR3 treated OC

Figure 3

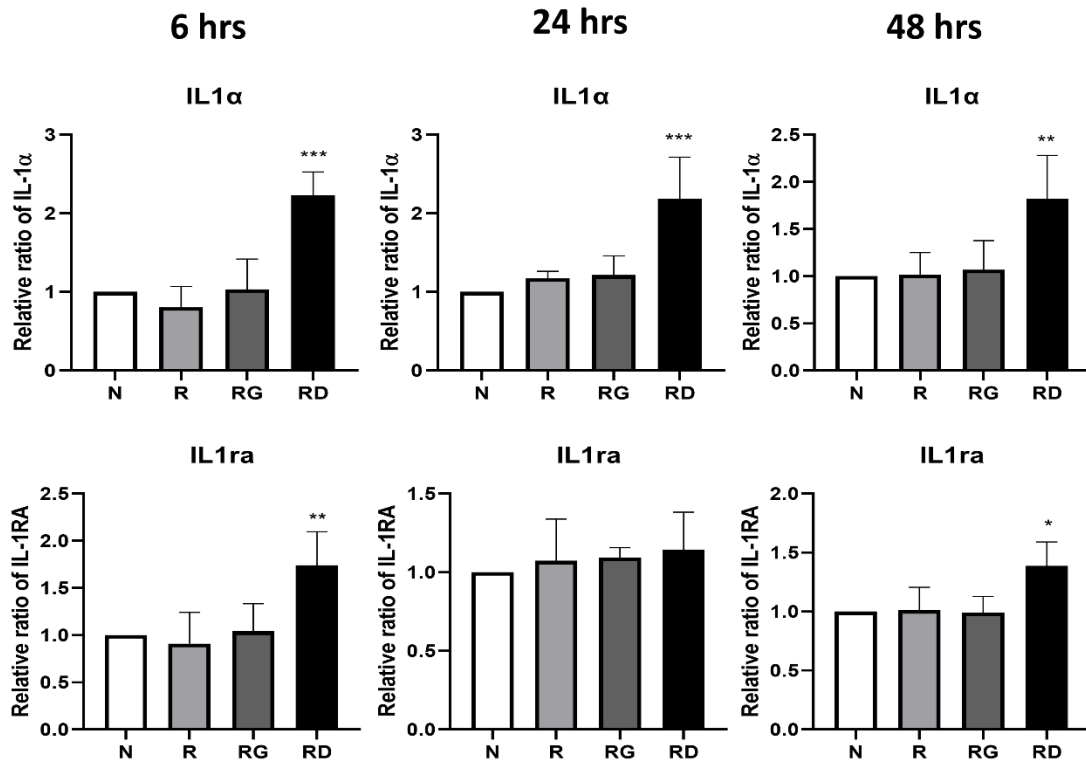

**sFig. 3 Effects of DCR3 on IL-1 $\alpha$  and IL-1ra protein expression on RANKL-induced osteoclast differentiation.**

RAW264.7 cells were treated with 10  $\mu$ g/ml DCR3 or IgG in the presence of RANKL (50 ng/ml) stimulation for 6, 24 or 48 hours. Cell extracts were analysed by immunoblotting assay. Equal amounts of protein were loaded in each lane as demonstrated by the level of GAPDH. A representative result of at least three independent experiments is shown. (N: RAW264.7 cells; R: RANKL; RG: RANKL + IgG; RD: RANKL + DCR3; \*P < 0.05; \*\*P < 0.01; \*\*\*P < 0.001)

## List of murine PCR primers

### Supplementary table

Table 1

| Genes         | Nucleotide sequences                        |
|---------------|---------------------------------------------|
| IL-1 $\alpha$ | 5'- CGCTTGAGTCGGCAAAGAAA -3' (forward)      |
|               | 5'- CTTCCCGTTGCTTGACGTTG -3' (reverse)      |
| sIL-1ra       | 5'- CCTCGGGATGGAAATCTG -3' (forward)        |
|               | 5'- CTGGTTGTTTCTCAGGTAAAAGG -3' (reverse)   |
| icIL-1ra      | 5'- GCTCCTTTATACACAGCAAGTCTCT -3' (forward) |
|               | As antisense sIL-1ra                        |
| GAPDH         | 5'- GTGAGGCCGGTGCTGAGTATGT -3' (forward)    |
|               | 5'- ACAGTCTTCTGGGTGGCAGTGAT -3' (reverse)   |
